# Supplementary material for: Molecular Diagnosis and Identification of Novel Pathogenic Variants in a Large Cohort of Italian Patients Affected by Polycystic Kidney Diseases
Source: MDPI journal article supplement (doi:10.3390/genes14061236), 2023-06-08
Supplement: s1 [file s1]

**Supplementary Table S1:** Genes comprised in the PKD disease NGS panel.

| <u>Gene symbol</u> | <u>Official Full Name</u>                                                         | <u>Function</u>                                                                                                                                                                                                                                                                                                                                                                                               | <u>Mode of inheritance</u> | <u>Phenotypes</u>                                                           |
|--------------------|-----------------------------------------------------------------------------------|---------------------------------------------------------------------------------------------------------------------------------------------------------------------------------------------------------------------------------------------------------------------------------------------------------------------------------------------------------------------------------------------------------------|----------------------------|-----------------------------------------------------------------------------|
| 1 ACTN4            | Actinin, alpha-4                                                                  | ACTN4 may act to anchor microfilaments to various cellular structures. Alpha-actinin is highly expressed in the glomerular podocyte, and is upregulated early in the course of some animal models of nephrotic syndrome.                                                                                                                                                                                      | autosomal dominant         | Focal segmental glomerulosclerosis                                          |
| 2 AHI1             | Abelson helper integration site 1                                                 | AHI1 is a component of a protein complex in the basal body, a ring-like structure that functions in the transition zone at the base of cilia. This complex acts as a barrier to restrict protein diffusion between plasma and ciliary membranes.                                                                                                                                                              | autosomal recessive        | Joubert syndrome 3                                                          |
| 3 ANLN             | Actin-binding protein anillin                                                     | ANLN is an actin-binding protein that functions in cell growth and migration, as well as in cytokinesis.                                                                                                                                                                                                                                                                                                      | autosomal dominant         | Focal segmental glomerulosclerosis                                          |
| 4 ANKS6            | Ankyrin repeat and sterile alpha motif domains-containing protein 6               | ANKS6 assembles a complex of ciliary proteins required for renal and cardiovascular development.                                                                                                                                                                                                                                                                                                              | autosomal recessive        | Nephronophthisis 16 - Polycystic kidney disease - Heterotaxy syndrome       |
| 5 ATP6V0A4         | ATPase, H <sup>+</sup> transporting, lysosomal, v0 subunit a, isoform 4           | Vacuolar-type proton pumps help maintain acid-base homeostasis either within intracellular compartments or at plasma membranes. The pumps are made up of 13 subunits, which form 2 functional domains: a V1 domain where ATP hydrolysis provides energy for proton movement, and a membrane-anchored V0 domain where proton translocation takes place. ATP6V0A4 is 1 of the subunits that form the V0 domain. | autosomal recessive        | Distal renal tubular acidosis 3, with or without sensorineural hearing loss |
| 6 ATP6V1B1         | ATPase, H <sup>+</sup> transporting, lysosomal, 56/58-kd, v1 subunit b, isoform 1 | ATP6B1 encodes a component of vacuolar ATPase (V-ATPase), a multisubunit enzyme that mediates acidification of intracellular organelles. V-ATPases pump protons against an electrochemical gradient.                                                                                                                                                                                                          | autosomal recessive        | Distal renal tubular acidosis 2 with progressive sensorineural hearing loss |

|    |        |                                                  |                                                                                                                                                                                                                                                                |                     |                                                                   |
|----|--------|--------------------------------------------------|----------------------------------------------------------------------------------------------------------------------------------------------------------------------------------------------------------------------------------------------------------------|---------------------|-------------------------------------------------------------------|
| 7  | BBS4   | BBS4                                             | BBS4 is 1 of 7 BBS proteins that form the stable core of a protein complex required for ciliogenesis.                                                                                                                                                          | autosomal recessive | Bardet-Biedl syndrome                                             |
| 8  | BBS9   | BBS9                                             | BBS9 is an autosomal recessive disorder characterized by obesity, polydactyly, renal anomalies, retinopathy, and mental retardation.<br><br>For a general phenotypic description and a discussion of genetic heterogeneity of Bardet-Biedl syndrome, see BBS1. | autosomal recessive | Bardet-Biedl syndrome <sup>9</sup>                                |
| 9  | BBS10  | BBS10                                            | The BBS10 gene is likely to perform ciliary functions specific to vertebrates. The protein is thought to be involved in the regulation of WNT as well.                                                                                                         | autosomal recessive | Bardet-Biedl syndrome <sup>10</sup>                               |
| 10 | BBS12  | BBS12 Gene                                       | The BBS12 gene is likely to perform ciliary functions specific to vertebrates The protein is thought to be involved in the regulation of WNT as well.                                                                                                          | autosomal recessive | Bardet-Biedl syndrome <sup>12</sup>                               |
| 11 | CA2    | Carbonic Anhydrase II                            | Carbonic anhydrase II (CA) is a member of a family of zinc metalloenzymes.                                                                                                                                                                                     | autosomal recessive | Osteopetrosis, autosomal recessive 3, with renal tubular acidosis |
| 12 | CC2D2A | Coiled-coil and c2 domains-containing protein 2A | CC2D2A is a component of a protein complex in the basal body that functions in the transition zone at the base of cilia. This complex acts as a barrier to restrict protein diffusion between plasma and ciliary membranes.                                    | autosomal recessive | Joubert syndrome 9 - Meckel syndrome 6 - Joubert syndrome         |
| 13 | CD2AP  | CD2-associated protein                           | CD2AP is a critical scaffolding protein that facilitates intercellular junctions.                                                                                                                                                                              |                     | Focal segmental glomerulosclerosis                                |
| 14 | CEP83  | Centrosomal protein 83-KD                        | CEP83 is required for the docking of ciliary vesicles derived from the Golgi complex to the mother centriole, the interaction which initiates primary cilium assembly.                                                                                         | autosomal recessive | Nephronophthisis 18                                               |
| 15 | CEP164 | Centrosomal protein 164-KD                       | CEP164 is a basal body protein required for assembly of the primary cilium. CEP164 also has a critical role in DNA damage response.                                                                                                                            | autosomal recessive | Nephronophthisis 15 - Primary ciliary dyskinesia                  |

|    |        |                                               |                                                                                                                                                                                          |                                          |                                                                                                                                                   |
|----|--------|-----------------------------------------------|------------------------------------------------------------------------------------------------------------------------------------------------------------------------------------------|------------------------------------------|---------------------------------------------------------------------------------------------------------------------------------------------------|
| 16 | CEP290 | Centrosomal protein 290-KD                    | The CEP290 gene encodes a centrosomal protein involved in ciliary assembly and ciliary trafficking.                                                                                      | autosomal recessive                      | Meckel syndrome 4 - Bardet-Biedl syndrome - Joubert syndrome - Meckel syndrome Nephronophthisis - Skeletal dysplasia - Leber congenital amaurosis |
| 17 | COL4A3 | Collagen, type IV, lpha-3                     | Type IV collagen is found only in basement membranes, where it is the major structural component. COL4A3 is 1 of 6 alpha chains that form the heterotrimeric type IV collagen molecules. | autosomal dominant / autosomal recessive | Alport syndrome 3, Alport syndrome 2                                                                                                              |
| 18 | COL4A4 | Collagen, type IV, alpha-4                    | Type IV collagen is found only in basement membranes, where it is the major structural component. COL4A4 is 1 of 6 alpha chains that form the heterotrimeric type IV collagen molecules. | autosomal recessive                      | Alport syndrome 2                                                                                                                                 |
| 19 | COL4A5 | Collagen, type IV, alpha-5                    | Using a zebrafish model, it has been shown that Col4a5 on the surface of the tectum basement membrane bound Slit1 and guided retinal ganglion cell axons expressing.                     | X-linked                                 | Alport syndrome 1                                                                                                                                 |
| 20 | CRB2   | Crumbs cell polarity complex component 2      | The CRB2 gene encodes a polarity complex protein                                                                                                                                         | autosomal recessive                      | Focal segmental glomerulosclerosis 9                                                                                                              |
| 21 | DCDC2  | Doublecortin domain-containing protein 2      | DCDC2 plays a role in the inhibition of canonical WNT signaling. DCDC2 is a ciliary protein that binds tubulin and enhances microtubule polymerization.                                  | autosomal recessive                      | Nephronophthisis 19                                                                                                                               |
| 22 | FOXI1  | Forkhead box I1                               | Fkh11 is a transcription factor which, if mutated, can cause the onset of renal tubular acidosis Distal.                                                                                 | autosomal recessive                      | Renal tubular acidosis Distal                                                                                                                     |
| 23 | GLIS2  | Glis family zinc finger protein 2             | GLIS2 is a zinc finger protein implicated in transcriptional regulation.                                                                                                                 |                                          | Nephronophthisis 7                                                                                                                                |
| 24 | GREB1L | Greb1-like retinoic acid receptor coactivator | GREB1L is predicted to be involved in retinoic acid signaling.                                                                                                                           | autosomal dominant                       | Renal hypodysplasia/aplasia 3                                                                                                                     |

|    |         |                                                          |                                                                                                                                                                                                                                                                 |                     |                                                                                                                           |
|----|---------|----------------------------------------------------------|-----------------------------------------------------------------------------------------------------------------------------------------------------------------------------------------------------------------------------------------------------------------|---------------------|---------------------------------------------------------------------------------------------------------------------------|
| 25 | INVS    | Inversion of embryonic turning;<br>inv<br>nephrocystin 2 | INVS is part of a complex of ciliary proteins required for renal and cardiovascular development.                                                                                                                                                                | autosomal recessive | Polycystic kidney disease - Nephronophthisis 2                                                                            |
| 26 | LRP6    | Low density lipoprotein receptor-related protein 6       | he LRP6 gene encodes a member of the low density lipoprotein receptor (LDLR) gene family, which consists of cell surface proteins involved in receptor-mediated endocytosis of specific ligands. LRP6 and LRP5 play a role in WNT signaling.                    | autosomal dominant  | Kidney diseases                                                                                                           |
| 27 | MAPKBP1 | Mitogen-activated protein kinase-binding protein 1       | Mitogen-activated protein kinases (MAPKs) form a kinase tier module in which MAPK, MAPKK, and MAPKKK are held by scaffold proteins. The scaffold proteins, such as MAPKBP1, serve as a protein platform for selective and spatial kinase activation.            | autosomal recessive | Nephronophthisis 20                                                                                                       |
| 28 | MYO1E   | MYOSIN IE                                                | The MYO1E gene encodes a nonmuscle membrane-associated class I myosin with a motor-head domain that binds ATP and F-actin, a calmodulin-binding neck domain, and a tail domain. MYO1E is expressed in the podocyte membrane in the renal glomerulus.            | autosomal recessive | Focal segmental glomerulosclerosis                                                                                        |
| 29 | NPHS1   | Nephrin                                                  | The NPHS1 gene encodes nephrin, a kidney glomerular filtration barrier protein that is an essential component of the interpodocyte-spanning slit diaphragm.                                                                                                     | autosomal dominant  | Nephrotic syndrome, type 1 - Focal segmental glomerulosclerosis                                                           |
| 30 | NPHS2   | Podocin                                                  | The NPHS2 gene encodes podocin, a protein that is expressed at the insertion of the slit diaphragm in the renal glomerulus. Podocin is thus crucial in the establishment of the glomerular filtration barrier.                                                  | autosomal recessive | Nephrotic syndrome, type 2 -Focal segmental glomerulosclerosis                                                            |
| 31 | NEK8    | Nima-related Kinase 8                                    | NEK8 is part of a complex of ciliary proteins required for renal and cardiovascular development. NEK8 is also critical for cell cycle regulation through the Hippo signaling pathway.                                                                           | autosomal recessive | Nephronophthisis 9/Renal-hepatic-pancreatic dysplasia 2 -                                                                 |
| 32 | NOTCH2  | Notch receptor 2                                         | The NOTCH2 gene encodes a single pass transmembrane protein belonging to an evolutionarily conserved NOTCH receptor family. NOTCH signaling is activated through cell-cell contact: it regulates gene expression in association with transcriptional cofactors. | autosomal dominant  | Polycystic kidney disease - Primary ciliary dyskinesia - Skeletal dysplasia - Hajdu-Cheney syndrome - Alagille syndrome 2 |

|    |        |                                                                      |                                                                                                                                                                                                                                                                                                                                                                     |                                             |                                                                                                                                             |
|----|--------|----------------------------------------------------------------------|---------------------------------------------------------------------------------------------------------------------------------------------------------------------------------------------------------------------------------------------------------------------------------------------------------------------------------------------------------------------|---------------------------------------------|---------------------------------------------------------------------------------------------------------------------------------------------|
| 33 | NPHP3  | Nephrocystin 3                                                       | NPHP3 is part of a complex of ciliary proteins required for renal and cardiovascular development.                                                                                                                                                                                                                                                                   | autosomal recessive                         | Polycystic kidney disease - Meckel syndrome<br>Nephronophthisis - Renal-hepatic-pancreatic dysplasia 1/Nephronophthisis 3/Meckel syndrome 7 |
| 34 | PAX2   | Paired box gene 2                                                    | In the developing kidney, induction of nephrogenesis by the ureter is accompanied by an increase in expression levels of the PAX2 gene.                                                                                                                                                                                                                             | autosomal dominant                          | Focal segmental glomerulosclerosis -<br>Glomerulosclerosis, focal segmental, 7                                                              |
| 35 | PMM2   | Phosphomannomutase 2                                                 | The PMM2 gene encodes phosphomannomutase, an enzyme necessary for the synthesis of GDP-mannose.                                                                                                                                                                                                                                                                     | autosomal recessive                         | Congenital disorder of glycosylation, type Ia                                                                                               |
| 36 | SEC61A | SEC61 translocon, alpha-1 subunit                                    | SEC61A1 is a subunit of the heteromeric SEC61 complex, which also contains beta and gamma subunits. The SEC61 complex forms the core of the mammalian endoplasmic reticulum (ER) translocon, a transmembrane channel for the translocation of proteins across the ER membrane.                                                                                      | autosomal dominant                          | Tubulointerstitial kidney disease, autosomal dominant, 5 - Familial juvenile hyperuricemic nephrophathy type 4                              |
| 37 | SLC4A1 | Solute carrier family 4 (anion exchanger), member 1                  | Band 3 is the major glycoprotein of the erythrocyte membrane. It mediates exchange of chloride and bicarbonate across the phospholipid bilayer and plays a central role in respiration of carbon dioxide.                                                                                                                                                           | autosomal dominant                          | Distal renal tubular acidosis 1 - Distal renal tubular acidosis 4 with hemolytic anemia                                                     |
| 38 | SLC4A4 | Solute carrier family 4 (sodium bicarbonate cotransporter), member 4 | Sodium bicarbonate cotransporters (NBCs) mediate the coupled movement of sodium and bicarbonate ions across the plasma membrane of many cells. This is an electrogenic process with an apparent stoichiometry of 3 bicarbonate ions per sodium ion. Sodium bicarbonate cotransport is involved in bicarbonate secretion/absorption and intracellular pH regulation. | autosomal recessive                         | Renal tubular acidosis, proximal, with ocular abnormalities                                                                                 |
| 39 | VHL    | Von Hippel-Lindau tumor suppressor                                   | The protein products of the VHL gene play a role in the oxygen-sensing pathway, in microtubule stability and orientation, tumor suppression, cilia formation, regulation of senescence, cytokine signaling, collagen IV regulation, and assembly of a normal extracellular fibronectin matrix.                                                                      | autosomal dominant                          | von Hippel-Lindau syndrome                                                                                                                  |
| 40 | TTC21B | Tetratricopeptide repeat domain-containing protein 21b               | The TTC21B gene encodes an axonemal protein required for retrograde intraflagellar transport and involved in ciliary function.                                                                                                                                                                                                                                      | autosomal dominant /<br>autosomal recessive | Skeletal ciliopathy - Joubert syndrome -<br>Nephronophthisis 12                                                                             |

|    |         |                                                                    |                                                                                                                                                                                                                      |                                          |                                                                                                              |
|----|---------|--------------------------------------------------------------------|----------------------------------------------------------------------------------------------------------------------------------------------------------------------------------------------------------------------|------------------------------------------|--------------------------------------------------------------------------------------------------------------|
|    |         |                                                                    |                                                                                                                                                                                                                      |                                          |                                                                                                              |
| 41 | TRPC6   | Transient receptor potential cation channel, subfamily c, member 6 | TRPC6 is a nonselective cation channel that is activated by diacylglycerol (DAG) in a membrane-delimited fashion, independently of protein kinase C.                                                                 | autosomal dominant                       | Focal segmental glomerulosclerosis                                                                           |
| 42 | TMEM67  | Proteina transmembrana 67, MKS3                                    | MKS1 and MKS3 have roles in ciliogenesis and renal tubulogenesis.                                                                                                                                                    | autosomal recessive                      | Nephronophthisis11                                                                                           |
| 43 | WDR19   | WD repeat-containing protein 19                                    | The nephronophthisis-13 (NPHP13) is caused by homozygous or compound heterozygous mutation in the WDR19 gene (608151) on chromosome 4p14.                                                                            | autosomal recessive                      | Skeletal ciliopathy - Nephronophthisis 13                                                                    |
| 44 | ZNF423  | Zinc finger protein 423                                            | ZNF423 localizes to the ciliary transition zone and is also involved in DNA damage repair.                                                                                                                           | autosomal dominant / autosomal recessive | Joubert syndrome 19 - Nephronophthisis 14                                                                    |
| 45 | ALG8    | ALG8 alpha-1,3-glucosyltransferase                                 | Required for PKD1/Polycystin-1 maturation and localization to the plasma membrane of the primary cilia. It adds the second glucose residue to the lipid-linked oligosaccharide precursor for N-linked glycosylation. | autosomal dominant                       | cystic liver disease; cystic kidney disease; Polycystic liver disease 3                                      |
| 46 | ALG9    | ALG9 alpha-1,2-mannosyltransferase                                 | Catalyzes the transfer of mannose from Dol-P-Man to lipid-linked oligosaccharides.                                                                                                                                   | monoallelic and autosomal recessive      | cystic liver disease<br><br>cystic kidney disease<br><br>Gillesen-Kaesbach-Nishimura syndrome,               |
| 47 | DNAJB11 | DnaJ heat shock protein family (Hsp40) member B11                  | As a co-chaperone for HSPA5 it is required for proper folding, trafficking or degradation of proteins. It is necessary for maturation and correct trafficking of PKD1.                                               | autosomal dominant                       | cystic kidney disease; end stage renal failure; Polycystic kidney disease; Tubulointerstitial kidney disease |
| 48 | DZIP1L  | DAZ interacting zinc finger protein 1 like                         | Involved in primary cilium formation.                                                                                                                                                                                | Autosomal recessive                      | ARPKD; Polycystic kidney disease 5                                                                           |

|    |       |                                                                |                                                                                                                                                                                                                                                                                                                                                          |                     |                                                                                               |
|----|-------|----------------------------------------------------------------|----------------------------------------------------------------------------------------------------------------------------------------------------------------------------------------------------------------------------------------------------------------------------------------------------------------------------------------------------------|---------------------|-----------------------------------------------------------------------------------------------|
| 49 | GLA   | Galactosidase Alpha                                            | Catalyzes the hydrolysis of glycosphingolipids and participates to their degradation in the lysosome.                                                                                                                                                                                                                                                    | autosomal dominant  | Fabry disease, cardiomyopathy                                                                 |
| 50 | GANAB | Glucosidase II alpha subunit                                   | Required for PKD1/Polycystin-1 and PKD2/Polycystin-2 maturation and localization to the cell surface and cilia. Catalytic subunit of glucosidase II that cleaves sequentially the 2 innermost alpha-1,3-linked glucose residues from the oligosaccharide precursor of immature glycoproteins.                                                            | autosomal dominant  | Mild cystic kidney and liver disease; Polycystic kidney disease 3                             |
| 51 | HNF1B | HNF1 homeobox B                                                | Transcription factor, probably binds to the inverted palindrome 5'-GTTAATNATTAAC-3'.                                                                                                                                                                                                                                                                     | autosomal dominant  | Renal cysts and diabetes syndrome                                                             |
| 52 | LRP5  | LDL receptor related protein 5                                 | Acts as a coreceptor with members of the frizzled family of seven-transmembrane spanning receptors to transduce signal by Wnt proteins                                                                                                                                                                                                                   |                     | Polycystic Liver Disease 4 With Or Without Kidney Cysts                                       |
| 53 | OFD1  | OFD1 centriole and centriolar satellite protein                | Involved in the biogenesis of the cilium, a centriole-associated function.                                                                                                                                                                                                                                                                               | X-linked            | Oral-facial-digital syndrome 1; Joubert syndrome                                              |
| 54 | PKD1  | polycystin 1, transient receptor potential channel interacting | Component of a heteromeric calcium-permeable ion channel formed by PKD1 and PKD2 that is activated by interaction between PKD1 and a Wnt family member, such as WNT3A and WNT9B. Both PKD1 and PKD2 are required for channel activity. Involved in renal tubulogenesis.                                                                                  | autosomal dominant  | Polycystic kidney disease, adult type I, Autosomal dominant polycystic kidney disease (ADPKD) |
| 55 | PKD2  | polycystin 2, transient receptor potential cation channel      | Component of a heteromeric calcium-permeable ion channel formed by PKD1 and PKD2 that is activated by interaction between PKD1 and a Wnt family member, such as WNT3A and WNT9B. Can also form a functional, homotetrameric ion channel. Functions as a cation channel involved in fluid-flow mechanosensation by the primary cilium in renal epithelium | autosomal dominant  | Polycystic Kidney Disease, Autosomal Dominant<br><br>Polycystic kidney disease 2              |
| 56 | PKHD1 | PKHD1 ciliary IPT domain containing fibrocystin/polyductin     | Promotes ciliogenesis in renal epithelial cells and therefore participates in the tubules formation and/ or ensures the maintenance of the architecture of the lumen of the kidney                                                                                                                                                                       | autosomal recessive | Autosomal Recessive Polycystic Kidney Disease                                                 |

|    |        |                                                |                                                                                                                                                                                                                                                                                                 |                     |                                                                                                                                                                                                              |
|----|--------|------------------------------------------------|-------------------------------------------------------------------------------------------------------------------------------------------------------------------------------------------------------------------------------------------------------------------------------------------------|---------------------|--------------------------------------------------------------------------------------------------------------------------------------------------------------------------------------------------------------|
| 57 | PRKCSH | Protein kinase C substrate 80K-H               | Regulatory subunit of glucosidase II that cleaves sequentially the 2 innermost alpha-1,3-linked glucose residues from the oligosaccharide precursor of immature glycoproteins. Required for efficient PKD1/Polycystin-1 biogenesis and trafficking to the plasma membrane of the primary cilia. | autosomal recessive | Polycystic Liver Disease                                                                                                                                                                                     |
| 58 | REN    | Renin                                          | Highly specific endopeptidase, whose only known function is to generate angiotensin I from angiotensinogen in the plasma, initiating a cascade of reactions that produce an elevation of blood pressure and increased sodium retention by the kidney.                                           | autosomal dominant  | Autosomal dominant tubulointerstitial kidney disease (ADTKD)                                                                                                                                                 |
| 59 | SEC61B | SEC61 translocon subunit beta                  | Component of SEC61 channel-forming translocon complex that mediates transport of signal peptide-containing precursor polypeptides across the endoplasmic reticulum. Required for PKD1/Polycystin-1 biogenesis                                                                                   |                     | Polycystic liver disease; polycystic kidney disease 4                                                                                                                                                        |
| 60 | SEC63  | SEC63 homolog, protein translocation regulator | Mediates cotranslational and post-translational transport of certain precursor polypeptides across endoplasmic reticulum                                                                                                                                                                        | autosomal dominant  | Polycystic liver disease; Unexplained kidney failure in young people; Renal ciliopathies. Cystic kidney disease; Rare multisystem ciliopathy disorders; Unexplained paediatric onset end-stage renal disease |
| 61 | TSC1   | TSC complex subunit 1                          | In complex with TSC2, inhibits the nutrient-mediated or growth factor-stimulated phosphorylation of S6K1 and EIF4EBP1. Involved in microtubule-mediated protein transport                                                                                                                       | autosomal dominant  | Tuberous Sclerosis; Kidney disease                                                                                                                                                                           |
| 62 | TSC2   | TSC complex subunit 2                          | In complex with TSC1, this tumor suppressor inhibits the nutrient-mediated or growth factor-stimulated phosphorylation of S6K1 and EIF4EBP1. May also play a role in microtubule-mediated protein transport                                                                                     | autosomal dominant  | Focal Cortical Dysplasia, Type II; Tuberous Sclerosis                                                                                                                                                        |
| 63 | UMOD   | Uromodulin                                     | Functions in biogenesis and organization of the apical membrane of epithelial cells of the thick ascending limb of Henle's loop (TALH), where it promotes formation of complex filamentous gel-like structure that may play a role in the water barrier permeability                            | autosomal dominant  | Medullary Cystic Kidney Disease 2<br><br>Hyperuricemic nephropathy, familial juvenile 1,                                                                                                                     |
