# Supplementary material for: Molecular Diagnosis and Identification of Novel Pathogenic Variants in a Large Cohort of Italian Patients Affected by Polycystic Kidney Diseases
Source: MDPI journal article supplement (doi:10.3390/genes14061236), 2023-06-08
Supplement: s1 [file s1]

**Supplementary Table S2:** Pathogenic and likely pathogenic mutations in AD genes

|             | cDNA change      | Region | Protein variant      | ACMG Classification | Coding impact |
|-------------|------------------|--------|----------------------|---------------------|---------------|
| <i>PKD1</i> | c.10026delT      | Ex30   | p.Leu3343SerfsTer54  | P                   | frameshift    |
|             | c.10217+2T>G     | Int32  | -                    | P                   | Splicing      |
|             | c.10420C>T       | Ex34   | p.Gln3474Ter         | P                   | nonsense      |
|             | c.10459C>T       | Ex34   | p.Gln3487Ter         | P                   | nonsense      |
|             | c.10549G>T       | Ex35   | p.Glu3517Ter         | LP                  | nonsense      |
|             | c.10591C>T       | Ex35   | p.Gln3531Ter         | P                   | nonsense      |
|             | c.10722G>A       | Ex36   | p.Trp3574Ter         | P                   | nonsense      |
|             | c.10807G>C       | Ex36   | p.Glu3603Gln         | LP                  | missense      |
|             | c.10894_10895del | Ex37   | p.Ser3632ProfsTer88  | P                   | frameshift    |
|             | c.10973_10987del | Ex37   | p.Glu3658_Lys3662del | LP                  | in frame      |
|             | c.1105_1106del   | Ex5    | p.Ser369Ter          | P                   | nonsense      |
|             | c.11267-1G>T     | Int39  | -                    | P                   | splicing      |
|             | c.11357_11361dup | Ex40   | p.His3788Valfs*39    | LP                  | frameshift    |
|             | c.1141G>A        | Ex5    | p.Gly381Ser          | P                   | missense      |
|             | c.11438_11439del | Ex41   | p.Tyr3813Ter         | LP                  | nonsense      |
|             | c.11534G>T       | Ex41   | p.Arg3845Met         | P                   | missense      |
|             | c.11560_11561del | Ex42   | p.Thr3854AlafsTer105 | P                   | frameshift    |
|             | c.11568C>G       | Ex42   | p.Tyr3856Ter         | P                   | nonsense      |
|             | c.11571C>G       | Ex42   | p.Tyr3857Ter         | P                   | nonsense      |
|             | c.11646_11659del | Ex42   | p.Ser3883CysfsTer72  | P                   | frameshift    |
|             | c.11705_11708del | Ex42   | p.Thr3902ArgfsTer41  | LP                  | frameshift    |
|             | c.11766G>A       | Ex43   | p.Trp3922Ter         | P                   | missense      |
|             | c.11881C>T       | Ex43   | p.Gln3961Ter         | P                   | nonsense      |
|             | c.11967_11974dup | Ex43   | p.Ser3992TrpfsTer49  | P                   | frameshift    |
|             | c.1198C>T        | Ex5    | p.Arg400Ter          | P                   | nonsense      |
|             | c.12008dupA      | Ex 44  | p.Gln4005AlafsTer152 | P                   | frameshift    |
|             | c.12010C>T       | Ex44   | p.Gln4004Ter         | P                   | nonsense      |
|             | c.12058C>T       | Ex44   | p.Arg4021Ter         | P                   | nonsense      |
|             | c.1273_1275del   | Ex6    | p.Glu425del          | LP                  | in frame      |
|             | c.1987C>T        | Ex10   | p.Gln663Ter          | P                   | nonsense      |
|             | c.2028dupC       | Ex10   | p.Gly677ArgfsTer37   | LP                  | frameshift    |
|             | c.2085delC       | Ex10   | p.Ala696ArgfsTer89   | P                   | frameshift    |
|             | c.2180T>C        | Ex11   | p.Leu727Pro          | LP                  | missense      |
|             | c.2215dupC       | Ex11   | p.Gln739ProfsTer59   | LP                  | frameshift    |
|             | c.2534T>C        | Ex11   | p.Leu845Ser          | P                   | missense      |
|             | c.271_272delTC   | Ex2    | p.Ser91GlyfsTer22    | P                   | frameshift    |
|             | c.2711_2712delAG | Ex11   | p.Glu904GlyfsTer196  | LP                  | frameshift    |
|             | c.3067C>T        | Ex13   | p.Gln1023Ter         | P                   | nonsense      |
|             | c.3202C>T        | Ex14   | p.Gln1068Ter         | P                   | nonsense      |
|             | c.3295+2T>C      | Int14  | -                    | LP/P                | splicing      |
|             | c.3349C>T        | Ex15   | p.Gln1117Ter         | P                   | nonsense      |
|             | c.3398_3399del   | Ex15   | p.Val1133GlufsTer2   | P                   | frameshift    |
|             | c.3514C>T        | Ex15   | p.Gln1172Ter         | P                   | nonsense      |
|             | c.3520_3527del   | Ex15   | p.Gln1174Cysfs34Ter  | LP                  | frameshift    |
|             | c.359+2T>G       | Int3   | -                    | P                   | Splicing      |
|             | c.3706C>T        | Ex15   | p.Gln1236Ter         | P                   | nonsense      |
|             | c.3745del        | Ex15   | p.Asp1249ThrfsTer24  | P                   | frameshift    |
|             | c.3802C>T        | Ex15   | p.Gln1268Ter         | LP                  | nonsense      |
|             | c.3955G>A        | Ex15   | p.Gly1319Arg         | P                   | missense      |
|             | c.427C>T         | Ex4    | p.Gln143Ter          | LP                  | nonsense      |
|             | c.4888C>T        | Ex15   | p.Gln1630Ter         | P                   | nonsense      |
|             | c.4951C>T        | Ex15   | p.Gln1651Ter         | P                   | nonsense      |
|             | c.5014_5015del   | Ex15   | p.Arg1672GlyfsTer98  | P                   | frameshift    |
|             | c.5154_5163dup   | Ex15   | p.Met1722GlyfsTer52  | P                   | frameshift    |

|              |                    |        |                      |    |            |
|--------------|--------------------|--------|----------------------|----|------------|
|              | c.5607dup          | Ex15   | p.Asn1870GlnfsTer120 | P  | frameshift |
|              | c.5609A>G          | Ex15   | p.Asn1870Ser         | LP | missense   |
|              | c.5869_5870dup     | Ex15   | p.Ser1957ArgfsTer16  | LP | frameshift |
|              | c.5884C>T          | Ex15   | p.Gln1962Ter         | P  | nonsense   |
|              | c.5905G>T          | Ex15   | p.Glu1969Ter         | P  | nonsense   |
|              | c.6050C>T          | Ex15   | p.Ser2017Leu         | P  | missense   |
|              | c.6199C>T          | Ex15   | p.Gln2067Ter         | P  | nonsense   |
|              | c.6504C>G          | Ex15   | p.Tyr2168Ter         | P  | nonsense   |
|              | c.6560G>A          | Ex15   | p.Trp2187*           | P  | nonsense   |
|              | c.680_681ins       | Ex5    | p.Gln227HisfsTer34   | LP | frameshift |
|              | c.6916-9G>A        | Int15  | -                    | LP | splicing   |
|              | c.7416_7417ins     | Ex18   | p.Gly2473ArgfsTer28  | LP | frameshift |
|              | c.7597_7598del     | Ex19   | p.Ser2533GlnfsTer61  | P  | missense   |
|              | c.7864_7899del     | Ex21   | p.Tyr2622_Lys2633del | p  | in frame   |
|              | c.7984C>T          | Ex21   | p.Gln2662Ter         | LP | nonsense   |
|              | c.8162-1G>A        | Int22  | -                    | P  | splicing   |
|              | c.8238delG         | Ex23   | p.Met2747TrpfsTer9   | LP | frameshift |
|              | c.8279T>G          | Ex23   | p.Met2760Arg         | LP | missense   |
|              | c.8284_8295del     | Ex23   | p.Ile2762_Arg2765del | LP | in frame   |
|              | c.8311G>A          | Ex23   | p.GIU2777 Lys        | P  | missense   |
|              | c.8371_8372dup     | Ex23   | p.Ser2792GlyfsTer84  | P  | frameshift |
|              | c.8698C>T          | Ex23   | p.Gln2900Ter         | P  | nonsense   |
|              | c.8935_8937del     | Ex24   | p.Phe2979del         | P  | in frame   |
|              | c.9425_9426ins     | Ex27   | p.Tyr3143ValfsTer36  | P  | frameshift |
|              | c.6504C>G          | Ex15   | p.Tyr2168Ter         | P  | nonsense   |
|              | c.9562A>G          | Ex27   | p.Asn3188Asp         | LP | missense   |
|              | c.9564_9566del     | Ex27   | p.Asn3188del         | LP | in frame   |
|              | c.9568G>C          | Ex27   | p.Gly3190Arg         | P  | missense   |
|              | c.9771_9774del     | Ex29   | p.Phe3257LeufsTer58  | P  | frameshift |
| <b>PKD2</b>  | c.1094+3_1094+6del | Int4   | -                    | P  | splicing   |
|              | c.1142G>T          | Ex5    | p.Gly381Val          | LP | missense   |
|              | c.1244T>G          | Ex5    | p.Leu415Arg          | P  | missense   |
|              | c.1249C>T          | Ex5    | p.Arg417Ter          | P  | nonsense   |
|              | c.1319+1G>A        | Int5   | -                    | P  | splicing   |
|              | c.1395T>A          | Ex6    | p.Tyr465Ter          | LP | nonsense   |
|              | c.1837C>T          | Ex8    | p.Gln613Ter          | P  | nonsense   |
|              | c.2117del          | Ex10   | p.Lys706ArgfsTer10   | LP | frameshift |
|              | c.2358del          | Int 11 | p.Glu787ArgfsTer14   | P  | splicing   |
|              | c.2419C>T          | Ex13   | p.Arg807Ter          | P  | nonsense   |
|              | c.2614 C>T         | Ex14   | p.Arg872Ter          | LP | nonsense   |
|              | c.261G>A           | Ex1    | p.Trp87Ter           | P  | nonsense   |
|              | c.595+3A>T         | Int1   | -                    | P  | Splicing   |
|              | c.637C>T           | Ex2    | p.Arg213Ter          | P  | nonsense   |
|              | c.709+1G>A         | Int2   | -                    | P  | splicing   |
|              | c.916C>T           | Ex4    | p.Arg306Ter          | P  | nonsense   |
|              | c.958C>T           | Ex14   | p.Arg872Ter          | P  | nonsense   |
|              | c.964C>T           | Ex4    | p.Arg322Trp          | P  | missense   |
|              | c.974G>A           | Ex4    | p.Arg325Gln          | LP | missense   |
| <b>VHL</b>   | c.217C>T           | Ex1    | p.Gln73Ter           | P  | nonsense   |
| <b>GANAB</b> | c.598C>T           | Ex3    | p.Arg200Trp          | P  | missense   |
| <b>HNF1B</b> | c.2087G>A          | Ex18   | p.Arg696Gln          | LP | missense   |
| <b>HNF1B</b> | c.1462C>T          | Ex7    | p.Gln488Ter          | LP | nonsense   |
| <b>UMOD</b>  | c.767G>A           | Ex3    | p.Cys256Tyr          | LP | Mssense    |
| <b>TSC2</b>  | c.5176C>T          | Ex40   | p.Arg1726Trp         | LP | missense   |
| <b>LRP5</b>  | c.1481G>A          | Ex7    | p.Arg494Gln          | LP | missense   |
|              | c.3688G>T          | Ex17   | p.Ala649Ser          | LP | missense   |

**Supplementary Table S3:** Pathogenic and likely pathogenic mutations in AR genes

|                | cDNA change | Region | Protein variant    | ACMG Classification |            |
|----------------|-------------|--------|--------------------|---------------------|------------|
| <i>PKHD1</i>   | c.1690C>T   | Ex18   | p.Arg564Ter p      | Pathogenic          | nonsense   |
|                | c.9107T>G   | Ex58   | p.Val3036Gly       | Likely Pathogenic   | missense   |
|                | c.431C>T    | Ex6    | p.Pro144Leu        | Likely Pathogenic   | missense   |
| <i>PMM2</i>    | c.713G>A    | Ex8    | p.Arg238His        | Pathogenic          | missense   |
|                | c.422G>A    | Ex5    | p.Arg141His        | Pathogenic          | missense   |
| <i>CEP164</i>  | c.3055C>T   | Ex24   | p.Gln1019Ter       | Pathogenic          | nonsense   |
| <i>MAPKBP1</i> | c.2271del   | Ex19   | p.Gly758AspfsTer74 | Likely Pathogenic   | Frameshift |

**Supplementary Table S4:** VUS variants in AD genes

|                     | cDNA change      | Region | Protein variant                                       | ACMG Classification | Coding impact |
|---------------------|------------------|--------|-------------------------------------------------------|---------------------|---------------|
| <b><i>PKD1</i></b>  | c.11639_11683del | Ex42   | p.Ala3880_Ala3894del                                  | VUS                 | in frame      |
|                     | c.12908A>T       | Ex46   | p.4303LeuextTer35                                     | VUS                 | stopLoss      |
|                     | c.9404C>T        | ex27   | p.Thr3135Met                                          | VUS                 | missense      |
|                     | c.2985+3A>C      | Int12  | -                                                     | VUS                 | splicing      |
|                     | c.2189C>T        | Ex11   | p.Ser730Leu                                           | VUS                 | missense      |
|                     | c.12446G>A       | Ex46   | p.Arg4150His                                          | VUS                 | missense      |
|                     | c.9625C>T        | Ex28   | p.Arg3209Cys                                          | VUS                 | missense      |
|                     | c.5911G>A        | Ex15   | p.Val1971Met                                          | VUS                 | missense      |
|                     | c.11870G>A       | Ex43   | p.Gly3957Asp                                          | VUS                 | missense      |
|                     | c.11585T>G       | Ex42   | p.Leu3862Arg                                          | VUS                 | missense      |
|                     | c.4835C>T        | Ex15   | p.Thr1612Met                                          | VUS                 | missense      |
|                     | c.1832G>C        | Ex9    | p.Arg611Pro                                           | VUS                 | missense      |
|                     | c.10914G>T       | Ex37   | p.Val3638=; p.Thr1667Ala;<br>p.Ser246Thr; p.Ala222Thr | VUS                 | Synonimus;    |
|                     | c.4999A>G        | Ex15   |                                                       | VUS                 | missense;     |
|                     | c.736T>A         | Ex5    |                                                       | VUS                 | missense;     |
|                     | c.664G>A         | Ex5    | p.Ala1202Val                                          | VUS                 | missense      |
|                     | c.3605C>T        | Ex15   |                                                       | VUS                 | missense      |
|                     | c.6484C>T        | Ex15   |                                                       | VUS                 | missense      |
|                     | c.9676A>G        | Ex28   | p.Arg2162Trp                                          | VUS                 | missense      |
|                     |                  |        | p.Asn3226Asp                                          | VUS                 | missense      |
| <b><i>PKD2</i></b>  | c.608C>T         | Ex2    | p.Thr203Ile                                           | VUS                 | missense      |
|                     | c.2670+5G>A      | Int 14 | -                                                     | VUS                 | Splicing      |
| <b><i>HNF1B</i></b> | c.226G>T         | Ex1    | p.Gly76Cys                                            | VUS                 | missense      |
| <b><i>ACTN4</i></b> | c.59A>G          | Ex1    | p.Asn20Ser                                            | VUS                 | missense      |
| <b><i>LRP5</i></b>  | c.226G>A         | Ex2    | p.Ala76Thr                                            | VUS                 | missense      |
|                     | c.713C>A         | Ex43   | p.Thr238Lys                                           | VUS                 | missense      |

**Supplementary Table S5:** VUS alterations in AR genes

|                | cDNA change | Region  | Protein variant | ACMG Classification | Coding impact |
|----------------|-------------|---------|-----------------|---------------------|---------------|
| <i>PKHD1</i>   | c.10036T>C  | Exon 60 | p.Cys3346Arg    | VUS                 | missense      |
|                | c.5585C>T   | Exon 34 | p.Ser1862Leu    | VUS                 | missense      |
|                | c.9402G>A   | Exon 58 | p.Lys3134=      | VUS                 | synonymous    |
|                | c.5665G>A   | Ex35    | p.Glu1889Lys    | VUS                 | missense      |
|                | c.11338C>T  | Ex63    | p.Pro3780Ser    | VUS                 | missense      |
|                | c.10538G>A  | Ex61    | p.Ser3513Asn    | VUS                 | missense      |
|                | c.129T>C    | Ex3     | p.Asp43=        | VUS                 | synonymous    |
| <i>NPHS1</i>   | c.2746G>T   | Ex20    | p.Ala916Ser     | VUS                 | missense      |
| <i>CEP290</i>  | c.4555A>T   | Ex35    | p.Ile1519Leu    | VUS                 | missense      |
| <i>ZNF423</i>  | c.2657G>A   | Ex43    | p.Arg886Gln     | VUS                 | missense      |
| <i>MAPKBP1</i> | c.3776C>G   | Ex30    | p.Ser1259Cys    | VUS                 | missense      |
| <i>MYO1E</i>   | c.1135C>G   | Ex11    | p.His379Asp     | VUS                 | missense      |
| <i>CC2D2A</i>  | c.4409T>G   | Ex35    | p.Leu1470Arg    | VUS                 | missense      |
| <i>NPHS2</i>   | c.686G>A    | Ex5     | p.Arg229Gln     | VUS                 | missense      |
| <i>NEK8</i>    | c.1837A>T   | Ex13    | p.Ile613Phe     | VUS                 | missense      |
| <i>NEK8</i>    | c.1736C>T   | Ex13    | p.Ser579Leu     | VUS                 | missense      |
| <i>NPHP3</i>   | c.1930G>A   | Ex13    | p.Val644Met     | VUS                 | missense      |
| <i>NPHS1</i>   | c.3418C>T   | Ex27    | p.Arg1140Cys    | VUS                 | missense      |
| <i>NPHS1</i>   | c.2819G>T   | Ex21    | p.Arg940Leu     | VUS                 | missense      |
| <i>BBS4</i>    | c.1027C>A   | Ex12    | p.Leu343Ile     | VUS                 | missense      |
| <i>FOXII</i>   | c.908G>A    | Ex2     | p.Gly303Glu     | VUS                 | missense      |
| <i>ANKS6</i>   | c.1400G>A   | Ex7     | p.Arg467Gln     | VUS                 | missense      |
| <i>COL4A4</i>  | c.1460G>A   | Ex22    | p.Gly487Glu     | VUS                 | missense      |
| <i>INVS</i>    | c.2296C>A   | Ex15    | p.Leu766Met     | VUS                 | missense      |
| <i>TTC21B</i>  | c.667C>G    | Ex6     | p.Leu223Val     | VUS                 | missense      |
| <i>CD2AP</i>   | c.491A>T    | Ex5     | p.Glu164Val     | VUS                 | missense      |
